# Supplementary material for: Ideal Cardiovascular Health and the Prevalence and Severity of Aortic Stenosis in Elderly Patients
Source: PubMed Central journal article supplement — J Am Heart Assoc. 2018 Feb 3;7(3):e007234. doi: 10.1161/JAHA.117.007234 (PMC5850241; doi:10.1161/jaha.117.007234), 2018-02-03
Supplement: JAH3-7-e007234-s001.pdf [file JAH3-7-e007234-s001.pdf]

# **SUPPLEMENTAL MATERIAL**

**Table S1.** The prevalence of missing data for each component of the CVHS at each ARIC visit.

|                | <b>BMI</b> | <b>Smoking status</b> | <b>Physical Activity</b> | <b>Cholesterol</b> | <b>Blood Pressure</b> | <b>Glucose</b> |
|----------------|------------|-----------------------|--------------------------|--------------------|-----------------------|----------------|
| <b>Visit 1</b> | 0.1%       | 0.1%                  | 0.3%                     | 1.3%               | 0.1%                  | 0.8%           |
| <b>Visit 2</b> | 2.3%       | 2.4%                  | -                        | 2.6%               | 2.2%                  | 2.4%           |
| <b>Visit 3</b> | 5.2%       | 5.4%                  | 5.4%                     | 5.5%               | 5.3%                  | 5.5%           |
| <b>Visit 4</b> | 6.8%       | 7.3%                  | -                        | 7.3%               | 6.8%                  | 7.3%           |
| <b>Visit 5</b> | 4.1%       | 12.5%                 | 4.3%                     | 1.7%               | 0.6%                  | 6.5%           |

ARIC = Atherosclerosis Risk in Communities Study; BMI = body mass index; CVHS = Cardiovascular health score

**Table S2.** Prevalence of aortic stenosis, defined using the peak aortic valve velocity, based on category of percent cumulative CVHS attained from visit 1 through 5 including confidence intervals. P for trend across categories is adjusted for age, sex, race and field center.

| Aortic stenosis         | Cumulative percent CVHS attained (Visits 1-5) |                  |                  |                  |                  | p for trend |
|-------------------------|-----------------------------------------------|------------------|------------------|------------------|------------------|-------------|
|                         | <50%                                          | 50% – <60%       | 60% – <70%       | 70% – <80%       | >80%             |             |
| None (%)                | 70 (66.8–72.7)                                | 75.4 (73.1–77.7) | 80.2 (78.4–82)   | 85.3 (83.1–88)   | 86.5 (84.2–88.8) | <0.001      |
| Sclerotic (%)           | 22 (19.4–24.7)                                | 18.3 (16.2–20.3) | 14.9 (13.3–16.5) | 12.6 (10.5–14.7) | 11 (8.9–13.1)    | <0.001      |
| Mild (%)                | 7.2 (5.5–8.9)                                 | 5.1 (3.9–6.2)    | 4.4 (3.5–5.3)    | 1.9 (1.1–2.7)    | 2.3 (1.3–3.3)    | <0.001      |
| Moderate and severe (%) | 1.2 % (0.4–1.9)                               | 1.2 (0.7–1.8)    | 0.5 (0.1–0.9)    | 0.3 (0–0.6)      | 0.2 (0.0–0.5)    | 0.001       |

CVHS = Cardiovascular health score

**Table S3.** Prevalence and Odds of AV sclerosis, defined using the AV peak velocity, associated with each component metric of the CVHS. Prevalence is adjusted for age, sex, and race. The p for trend is calculated from a logistic regression model with CVHS category as the primary exposure variable and adjusted for age, sex, race and percent attainment of each of the other health metrics. Logistic regression models employed to calculate the OR associated with each CVHS category adjusted for age, sex, race, and percent attainment of each of the other health metrics.

| Metric            | <50%               |             | ≥50% to <60%       |                    | ≥60% to <70%       |                    | ≥70% to <80%       |                    | ≥80%               |                    | P for trend |
|-------------------|--------------------|-------------|--------------------|--------------------|--------------------|--------------------|--------------------|--------------------|--------------------|--------------------|-------------|
|                   | Prevalence         | OR (95% CI) | Prevalence         | OR (95% CI)        | Prevalence         | OR (95% CI)        | Prevalence         | OR (95% CI)        | Prevalence         | OR (95% CI)        |             |
| Smoking status    | 15.1 (12.6 – 17.6) | Ref         | 16.7 (8.5 – 25)    | 1.03 (0.55 – 1.94) | 14.9 (9.6 – 20.3)  | 0.87 (0.54 – 1.40) | 14.5 (9.1 – 20)    | 0.85 (0.52 – 1.37) | 16.1 (15.1 – 17.1) | 0.98 (0.79 – 1.22) | 0.94        |
| BMI               | 19.8 (18.2 – 21.4) | Ref         | 14.7 (12.5 – 16.9) | 0.72 (0.58 – 0.89) | 14.3 (11.3 – 17.3) | 0.70 (0.54 – 0.92) | 14.6 (10.9 – 18.3) | 0.73 (0.53 – 1.01) | 11.8 (10.2 – 13.3) | 0.58 (0.48 – 0.71) | <0.001      |
| Physical activity | 16.4 (14.8 – 18)   | Ref         | 16.5 (14.1 – 19)   | 1.05 (0.85 – 1.31) | 16.2 (13.3 – 19.1) | 1.07 (0.83 – 1.37) | 15.5 (12.9 – 18.2) | 1.02 (0.80 – 1.30) | 15 (13.2 – 16.7)   | 1.06 (0.88 – 1.29) | 0.73        |
| Total cholesterol | 17.4 (15.6 – 19.2) | Ref         | 14.3 (11.9 – 16.7) | 0.78 (0.62 – 0.99) | 14.8 (12.1 – 17.4) | 0.83 (0.65 – 1.06) | 15.6 (12.8 – 18.4) | 0.89 (0.69 – 1.14) | 15.7 (14.2 – 17.3) | 0.92 (0.77 – 1.10) | 0.61        |

|                 |                    |     |                    |                    |                    |                    |                  |                    |                   |                    |        |
|-----------------|--------------------|-----|--------------------|--------------------|--------------------|--------------------|------------------|--------------------|-------------------|--------------------|--------|
| Blood pressure  | 19.4 (17.5 – 21.2) | Ref | 17.3 (14.9 – 19.7) | 0.85 (0.69 – 1.04) | 18.7 (15.7 – 21.7) | 0.99 (0.78 – 1.26) | 15.3 (12.7 – 18) | 0.79 (0.62 – 1)    | 11.2 (9.8 – 12.6) | 0.57 (0.47 – 0.69) | <0.001 |
| Fasting glucose | 18.3 (15.9 – 20.9) | Ref | 17.4 (14.7 – 20)   | 0.99 (0.77 – 1.27) | 15.5 (13-18)       | 0.90 (0.69 – 1.16) | 16.9 (14.4-19.5) | 1.05 (0.82 – 1.34) | 14.4 (13 – 15.7)  | 0.97 (0.79 – 1.20) | 0.96   |

AV = Aortic Valve; CVHS = Cardiovascular health score; CI = Confidence interval; BMI = body mass index; OR = Odds ratio

**Table S4.** Prevalence and Odds of mild stenosis, defined using the AV peak velocity, associated with each component metric of the CVHS.

Prevalence is adjusted for age, sex, and race. The p for trend is calculated from a logistic regression model with CVHS category as the primary exposure variable and adjusted for age, sex, race and percent attainment of each of the other health metrics. Logistic regression models employed to calculate the OR associated with each CVHS category adjusted for age, sex, race, and percent attainment of each of the other health metrics.

| Metric            | <50%            |             | ≥50% to <60%     |                    | ≥60% to <70%    |                    | ≥70% to <80%     |                    | ≥80%            |                    | P for trend |
|-------------------|-----------------|-------------|------------------|--------------------|-----------------|--------------------|------------------|--------------------|-----------------|--------------------|-------------|
|                   | Prevalence      | OR (95% CI) | Prevalence       | OR (95% CI)        | Prevalence      | OR (95% CI)        | Prevalence       | OR (95% CI)        | Prevalence      | OR (95% CI)        |             |
| Smoking status    | 5.1 (3.4 – 6.7) | Ref         | 5.3 (0.3 – 10.3) | 1.04 (0.35 – 3.06) | 4.4 (1.3 – 7.6) | 0.76 (0.32 – 1.77) | 6.5 (2.6 – 10.3) | 1.18 (0.56 – 2.48) | 4.1 (3.5 – 4.6) | 0.72 (0.49 – 1.06) | 0.09        |
| BMI               | 5.2 (4.3 – 6.2) | Ref         | 5.6 (4.2 – 7)    | 1.20 (0.85 – 1.67) | 3.5 (1.9 – 5.1) | 0.70 (0.42 – 1.16) | 2.6 (0.9 – 4.3)  | 0.54 (0.27 – 1.09) | 2.7 (2 – 3.4)   | 0.61 (0.42 – 0.88) | 0.002       |
| Physical activity | 5.2 (4.2 – 6.2) | Ref         | 5 (3.5 – 6.4)    | 0.99 (0.68 – 1.43) | 3.1 (1.8 – 4.5) | 0.63 (0.38 – 1.04) | 3.3 (2.1 – 4.6)  | 0.67 (0.42 – 1.05) | 3.6 (2.8 – 4.5) | 0.81 (0.57 – 1.14) | 0.13        |
| Total cholesterol | 5.8 (4.7 – 6.9) | Ref         | 3.5 (2.3 – 4.8)  | 0.60 (0.39 – 0.92) | 5.5 (4.3 – 7.2) | 1.00 (0.68 – 1.48) | 3.8 (2.2 – 5.2)  | 0.66 (0.42 – 1.05) | 3 (2.3 – 3.7)   | 0.53 (0.38 – 0.74) | <0.001      |

|                 |                 |     |                 |                    |                 |                    |                 |                    |                 |                    |       |
|-----------------|-----------------|-----|-----------------|--------------------|-----------------|--------------------|-----------------|--------------------|-----------------|--------------------|-------|
| Blood pressure  | 5.6 (4.5 – 6.6) | Ref | 5.1 (3.8 – 6.5) | 0.88 (0.62 – 1.26) | 4.3 (2.7 – 5.8) | 0.80 (0.51 – 1.24) | 2.6 (1.4 – 3.7) | 0.47 (0.28 – 0.79) | 3.1 (2.3 – 3.9) | 0.63 (0.44 – 0.90) | 0.004 |
| Fasting glucose | 5.9 (4.4 – 7.3) | Ref | 5 (3.5 – 6.5)   | 0.89 (0.59 – 1.37) | 5.1 (3.6 – 6.6) | 1.00 (0.66 – 1.53) | 3.8 (2.4 – 5)   | 0.73 (0.46 – 1.15) | 3.4 (2.7 – 4.1) | 0.78 (0.53 – 1.13) | 0.13  |

AV = Aortic Valve; CVHS = Cardiovascular health score; CI = Confidence interval; BMI = body mass index; OR = Odds ratio

**Table S5.** Prevalence and Odds of moderate and severe stenosis, defined using the AV peak velocity, associated with each component metric of the CVHS. Prevalence is adjusted for age, sex, and race. The p for trend is calculated from a logistic regression model with CVHS category as the primary exposure variable and adjusted for age, sex, race and percent attainment of each of the other health metrics. Logistic regression models employed to calculate the OR associated with each CVHS category adjusted for age, sex, race, and percent attainment of each of the other health metrics.

| Metric            | <50%            |             | ≥50% to <60%    |                    | ≥60% to <70%   |                    | ≥70% to <80%    |                    | ≥80%            |                    | P for trend |
|-------------------|-----------------|-------------|-----------------|--------------------|----------------|--------------------|-----------------|--------------------|-----------------|--------------------|-------------|
|                   | Prevalence      | OR (95% CI) | Prevalence      | OR (95% CI)        | Prevalence     | OR (95% CI)        | Prevalence      | OR (95% CI)        | Prevalence      | OR (95% CI)        |             |
| Smoking status    | 1.3 (0.5 – 2.2) | Ref         | 0               | N/A                | 1.9 (0 – 4.1)  | 1.14 (0.29 – 4.44) | 0               | N/A                | 0.6 (0.4 – 0.8) | 0.37 (0.18 – 0.80) | 0.016       |
| BMI               | 0.9 (0.5 – 1.3) | Ref         | 0.8 (0.3 – 1.4) | 1.00 (0.44 – 2.27) | 1.1 (0.2 – 2)  | 1.30 (0.51 – 3.34) | 0.3 (0 – 0.9)   | 0.37 (0.48 – 2.84) | 0.3 (0 – 0.6)   | 0.43 (0.16 – 1.16) | 0.11        |
| Physical activity | 0.7 (0.4 – 1.1) | Ref         | 0.5 (0 – 0.9)   | 0.66 (0.21 – 2.02) | 0.5 (0 – 1.1)  | 0.73 (0.21 – 2.61) | 1.1 (0.3 – 1.8) | 1.78 (0.72 – 4.37) | 0.7 (0.3 – 1)   | 1.20 (0.52 – 2.77) | 0.32        |
| Total cholesterol | 0.6 (0.3 – 1)   | Ref         | 1 (0.3 – 1.6)   | 1.71 (0.67 – 4.33) | .9 (0.2 – 1.6) | 1.46 (0.52 – 4.03) | 0.5 (0 – 1)     | 0.82 (0.23 – 3)    | 0.7 (0.3 – 1)   | 1.17 (0.51 – 2.64) | 0.98        |



|                 |                 |     |                 |                    |                 |                    |               |                    |                 |                    |       |
|-----------------|-----------------|-----|-----------------|--------------------|-----------------|--------------------|---------------|--------------------|-----------------|--------------------|-------|
| Blood pressure  | 1.2 (0.7 – 1.7) | Ref | 0.7 (0.2 – 1.3) | 0.57 (0.24 – 1.37) | 0.2 (0 – 0.5)   | 0.14 (0.02 – 1.09) | 0.4 (0 – 0.9) | 0.36 (0.10 – 1.24) | 0.5 (0.2 – 0.8) | 0.48 (0.21 – 1.11) | 0.045 |
| Fasting glucose | 1.1 (0.5 – 1.8) | Ref | 1.1 (0.4 – 1.8) | 1.03 (0.42 – 2.56) | 0.7 (0.2 – 1.3) | 0.68 (0.25 – 1.89) | 0.5 (0 – 0.9) | 0.50 (0.16 – 1.60) | 0.5 (0.2 – 0.7) | 0.59 (0.24 – 1.44) | 0.14  |

AV = Aortic Valve; CVHS = Cardiovascular health score; CI = Confidence interval; BMI = body mass index; OR = Odds ratio

**Table S6.** Prevalence of aortic stenosis based on category of percent cumulative CVHS attained from visit 1 through 5 for sex. Values and P for trend across categories are adjusted for age, race and field center.

**Cumulative percent CVHS attained (Visits 1-5)**

| <b>Aortic stenosis Category</b> | <b>Sex</b>                     | <b>&lt;50%</b> | <b>50% – &lt;60%</b> | <b>60% – &lt;70%</b> | <b>70% – &lt;80%</b> | <b>&gt;80%</b> | <b>P for trend</b> | <b>P for Interaction</b> |
|---------------------------------|--------------------------------|----------------|----------------------|----------------------|----------------------|----------------|--------------------|--------------------------|
|                                 | Male (2,527)<br>Female (3,507) |                |                      |                      |                      |                |                    |                          |
| <b>None</b>                     | Male (%)                       | 69 (64-74)     | 74 (71-78)           | 80 (77-82)           | 84 (80-87)           | 82 (78-85)     | <0.001             |                          |
|                                 | Female (%)                     | 71 (67-75)     | 76 (73-79)           | 80 (78-83)           | 86 (83-89)           | 89 (87-92)     | <0.001             |                          |
| <b>Sclerotic</b>                | Male (%)                       | 23 (19-28)     | 19 (16-22)           | 14 (12-16)           | 13 (10-17)           | 14 (10-18)     | <0.001             | 0.13                     |
|                                 | Female (%)                     | 21 (18-24)     | 18 (15-20)           | 16 (14-18)           | 12 (9-15)            | 9 (7-12)       | <0.001             |                          |
| <b>Mild</b>                     | Male (%)                       | 7 (4-10)       | 5 (4-7)              | 6 (4-7)              | 2 (0.3-5)            | 3 (0.1-5)      | 0.003              | 0.07                     |
|                                 | Female (%)                     | 7 (5-9)        | 5 (3-6)              | 4 (2-5)              | 2 (1-3)              | 2 (1-3)        | <0.001             |                          |
| <b>Moderate and Severe</b>      | Male (%)                       | 1 (0-2)        | 1 (0.4-2)            | 1 (0.3-2)            | 0.5 (0-1)            | 0.6 (0-1)      | 0.21               | 0.1                      |
|                                 | Female (%)                     | 1.2 (0.2-2)    | 1.2 (0.4-2)          | 0.2 (0-5)            | 0.2 (0-5)            | 0              | 0.001              |                          |

CVHS = Cardiovascular health score

**Table S7.** Prevalence of aortic stenosis based on category of percent cumulative CVHS attained from visit 1 through 5 for race. Values and p for trend across categories is adjusted for age, sex and field center.

**Cumulative percent CVHS attained (Visits 1-5)**

| <b>Aortic stenosis Category</b> | <b>Race</b>                    |                |                      |                      |                      |                | <b>P for trend</b> | <b>P for Interaction</b> |
|---------------------------------|--------------------------------|----------------|----------------------|----------------------|----------------------|----------------|--------------------|--------------------------|
|                                 | White (4,713)<br>Black (1,321) | <b>&lt;50%</b> | <b>50% – &lt;60%</b> | <b>60% – &lt;70%</b> | <b>70% – &lt;80%</b> | <b>&gt;80%</b> |                    |                          |
| <b>None</b>                     | White (%)                      | 67 (64-71)     | 74 (71-78)           | 79 (77-81)           | 84 (81-86)           | 85 (83-88)     | <0.001             |                          |
|                                 | Black (%)                      | 78 (74-82)     | 81 (80-87)           | 85 (81-87)           | 90 (85-96)           | 96 (89-100)    | <0.001             |                          |
| <b>Sclerotic</b>                | White (%)                      | 23 (20-27)     | 19 (17-21)           | 16 (14-17)           | 14 (11-16)           | 12 (10-14)     | <0.001             | 0.9                      |
|                                 | Black (%)                      | 18 (14-21)     | 16 (12-20)           | 13 (9-16)            | 9 (4-14)             | 4 (0-10)       | 0.001              |                          |
| <b>Mild</b>                     | White (%)                      | 8 (5-10)       | 6 (5-7)              | 5 (4-6)              | 2 (1-3)              | 3 (2-4)        | <0.001             | 0.2                      |
|                                 | Black (%)                      | 4 (3-6)        | 2 (1-3)              | 3 (1-4)              | 0                    | 0              | 0.007              |                          |
| <b>Moderate and Severe</b>      | White (%)                      | 1.5 (0-3)      | 1.3 (1-2)            | 0.6 (0.2-1)          | 0.2 (0-1)            | 0.3 (0-1)      | 0.001              | 0.21                     |
|                                 | Black (%)                      | 0.5 (0-1)      | 1 (0.002-2)          | 0                    | 1 (0-4)              | 0              | 0.79               |                          |

CVHS = Cardiovascular health score

**Table S8.** Prevalence of aortic stenosis, defined using the calculated AVA, based on category of percent cumulative CVHS attained from visit 1 through 5 for sex. Values and p for trend across categories are adjusted for age, race and field center.

|                                 |                                | <b>Cumulative percent CVHS attained (Visits 1-5)</b> |                      |                      |                      |                |                    |                          |
|---------------------------------|--------------------------------|------------------------------------------------------|----------------------|----------------------|----------------------|----------------|--------------------|--------------------------|
| <b>Aortic stenosis Category</b> | <b>Sex</b>                     |                                                      |                      |                      |                      |                | <b>P for trend</b> | <b>P for Interaction</b> |
|                                 | Male (2.527)<br>Female (3.507) | <b>&lt;50%</b>                                       | <b>50% – &lt;60%</b> | <b>60% – &lt;70%</b> | <b>70% – &lt;80%</b> | <b>&gt;80%</b> |                    |                          |
| <b>None</b>                     | Male (%)                       | 65 (60-70)                                           | 68 (65-72)           | 75 (72-78)           | 78 (74-81)           | 76 (71-81)     | <0.001             |                          |
|                                 | Female (%)                     | 58 (53-61)                                           | 65 (62-68)           | 66 (63-69)           | 69 (65-72)           | 71 (68-75)     | <0.001             |                          |
| <b>Sclerotic</b>                | Male (%)                       | 14 (11-18)                                           | 12 (9-15)            | 8 (6-10)             | 9 (6-11)             | 10 (7-13)      | 0.012              | 0.10                     |
|                                 | Female (%)                     | 11 (8-13)                                            | 10 (8-12)            | 9 (7-11)             | 7 (5-9)              | 5 (3-6)        | <0.001             |                          |
| <b>Mild</b>                     | Male (%)                       | 14 (11-18)                                           | 13 (11-16)           | 11 (9-13)            | 11 (8-14)            | 11 (8-15)      | 0.1                | 0.17                     |
|                                 | Female (%)                     | 25 (21-28)                                           | 19 (16-22)           | 21 (18-23)           | 23 (19-26)           | 21 (17-24)     | 0.52               |                          |
| <b>Moderate and Severe</b>      | Male (%)                       | 6 (4-9)                                              | 7 (5-9)              | 6 (4-7)              | 3 (1-5)              | 3 (0.1-5)      | 0.004              | 0.47                     |
|                                 | Female (%)                     | 8 (5-10)                                             | 6 (4-8)              | 4 (3-7)              | 2 (1-3)              | 3 (1-4)        | <0.001             |                          |

AVA = Aortic valve area; CVHS = Cardiovascular health score

**Table S9.** Prevalence of aortic stenosis, defined using the calculated AVA, based on category of percent cumulative CVHS attained from visit 1 through 5 for race. Values and p for trend across categories are adjusted for age, sex, and field center.

|                                 |               | <b>Cumulative percent CVHS attained (Visits 1-5)</b> |                      |                      |                      |                |                    |                          |  |
|---------------------------------|---------------|------------------------------------------------------|----------------------|----------------------|----------------------|----------------|--------------------|--------------------------|--|
| <b>Aortic stenosis Category</b> | <b>Race</b>   |                                                      |                      |                      |                      |                | <b>P for trend</b> | <b>P for Interaction</b> |  |
|                                 | White (4.713) |                                                      |                      |                      |                      |                |                    |                          |  |
|                                 | Black (1.321) | <b>&lt;50%</b>                                       | <b>50% - &lt;60%</b> | <b>60% - &lt;70%</b> | <b>70% - &lt;80%</b> | <b>&gt;80%</b> |                    |                          |  |
| <b>None</b>                     | White (%)     | 58 (54–62)                                           | 65 (62–68)           | 70 (68–74)           | 71 (68–74)           | 72 (68–75)     | <0.001             |                          |  |
|                                 | Black (%)     | 66 (61–70)                                           | 71 (67–76)           | 71 (66–75)           | 76 (68–84)           | 89 (80–98)     | <0.001             |                          |  |
| <b>Sclerotic</b>                | White (%)     | 13 (10–15)                                           | 11 (9–13)            | 9 (8–11)             | 8 (6–10)             | 7 (5–9)        | <0.001             | 0.61                     |  |
|                                 | Black (%)     | 11 (8–14)                                            | 9 (7–12)             | 7 (4–10)             | 5 (1–9)              | 4 (0–10)       | 0.009              |                          |  |
| <b>Mild</b>                     | White (%)     | 21 (18–25)                                           | 17 (15–20)           | 16 (14–18)           | 18 (15–20)           | 18 (15–21)     | 0.32               | 0.66                     |  |
|                                 | Black (%)     | 19 (15–23)                                           | 15 (11–18)           | 19 (15–23)           | 18 (11–25)           | 7 (0–14)       | 0.35               |                          |  |
| <b>Moderate and Severe</b>      | White (%)     | 8 (6–10)                                             | 6 (5–8)              | 5 (4–6)              | 3 (1–4)              | 3 (2–5)        | <0.001             | 0.93                     |  |
|                                 | Black (%)     | 5 (3–7)                                              | 5 (3–7)              | 4 (1–5)              | 1 (0–3)              | 0              | 0.032              |                          |  |

AVA = Aortic valve area; CVHS = Cardiovascular health score

**Table S10.** Prevalence of aortic stenosis, defined using the AV peak velocity, based on category of percent cumulative CVHS attained from visit 1 through 5 including confidence intervals and utilizing inverse probability attrition weighting. P for trend across categories is adjusted for age, sex, race and field center.

| Aortic stenosis     | Cumulative percent CVHS attained (Visits 1-5) n=5943 |                   |                   |                   |                   | p for trend |
|---------------------|------------------------------------------------------|-------------------|-------------------|-------------------|-------------------|-------------|
|                     | <50%                                                 | 50% – <60%        | 60% – <70%        | 70% – <80%        | >80%              |             |
| None                | 68.8% (66.6–72)                                      | 76 % (72.6–78.1)  | 80.3% (78.4–82.1) | 85.4% (83.2–87.6) | 86.1% (83.7–88.5) | <0.001      |
| Sclerotic           | 22.5% (19.6-25.4)                                    | 18.4% (16.3-20.5) | 14.6% (12.9-16.2) | 12.2% (10.1-14.2) | 11.2% (10-13.4)   | <0.001      |
| Mild                | 7.6% (5.7-9.4)                                       | 5.2% (4-6.5)      | 4.6 % (3.7-5.6)   | 2.2% (1.2-3.2)    | 2.5 % (1.4-3.6)   | <0.001      |
| Moderate and severe | 1.2% (0.4-2.2)                                       | 1.4% (0.7-2)      | 0.6% (0.2-0.9)    | 0.3% (0-0.7)      | 0.3 % (0-0,7)     | 0.001       |

AV = Aortic Valve; CVHS = Cardiovascular health score

**Figure S1.** Distribution of aortic valve area among ARIC participants at Visit 5.

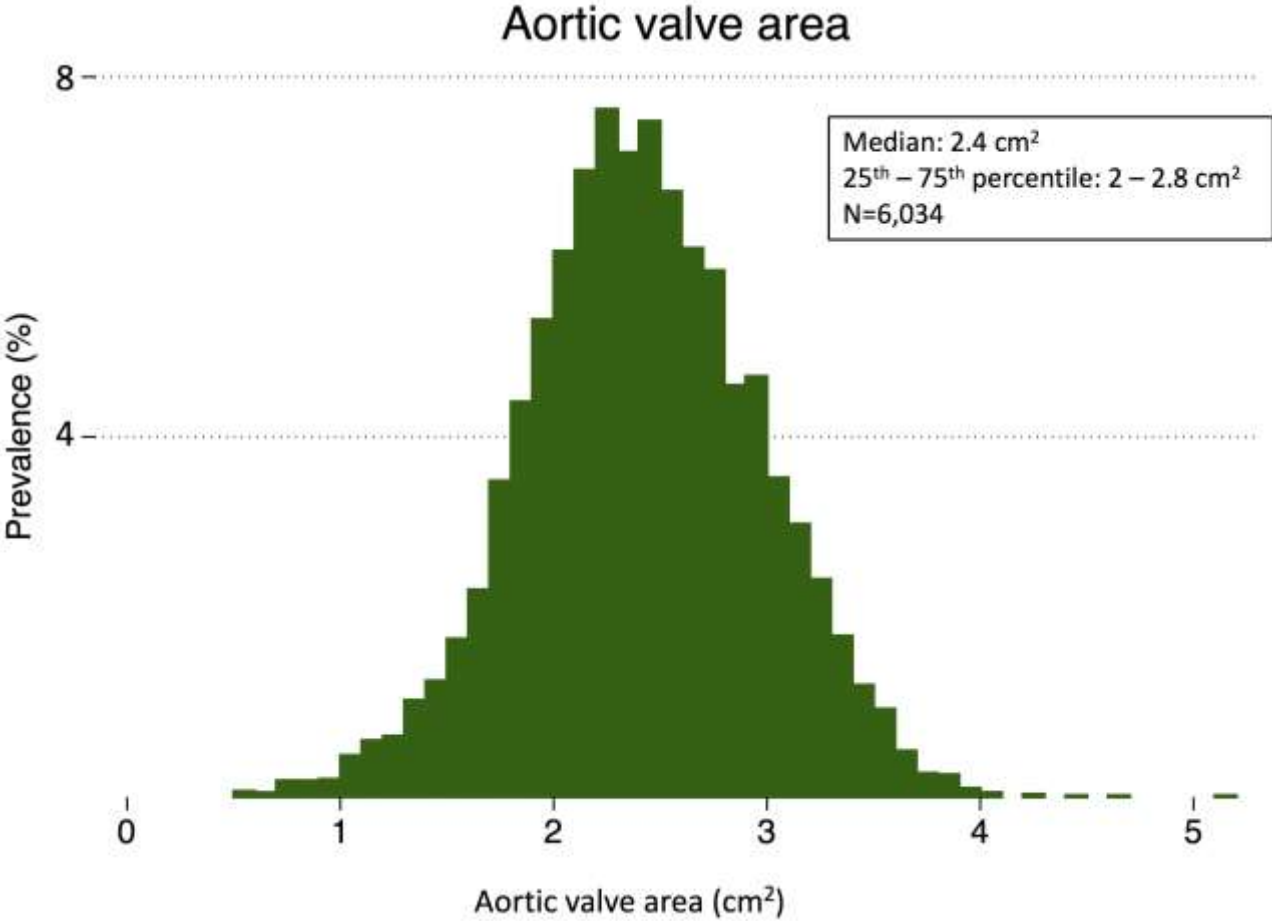

ARIC = Atherosclerosis Risk in Communities Study

**Figure S2.** Prevalence of aortic stenosis based on AS category, defined using the calculated AVA, and category of percent attained CVHS from visit 1 through 5.

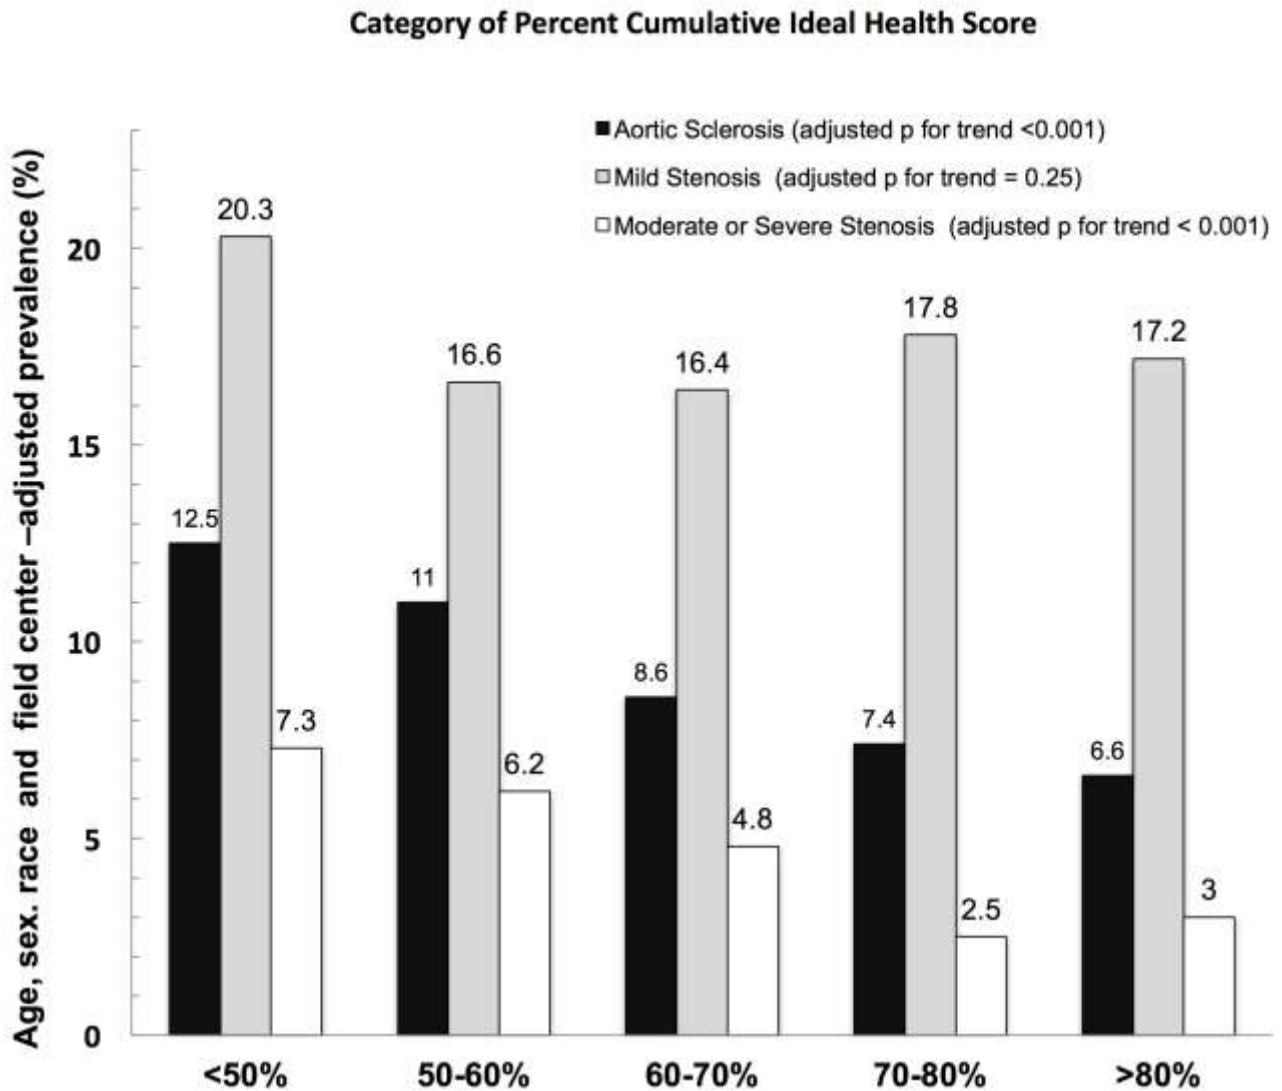

Participants are stratified based on attained CVHS attained from visit 1 through 5. P for trend across categories is adjusted for age, sex, and field center. AS = Aortic stenosis; AVA = Aortic valve area; CVHS = Cardiovascular health score



**Figure S3.** Prevalence of AS, defined using the AV peak velocity, based on category of percent attained CVHS from visit 1 through 5 excluding participants with coronary heart disease, atrial fibrillation, heart failure, stroke and eGFR <60 ml/min/1.73m<sup>2</sup>.

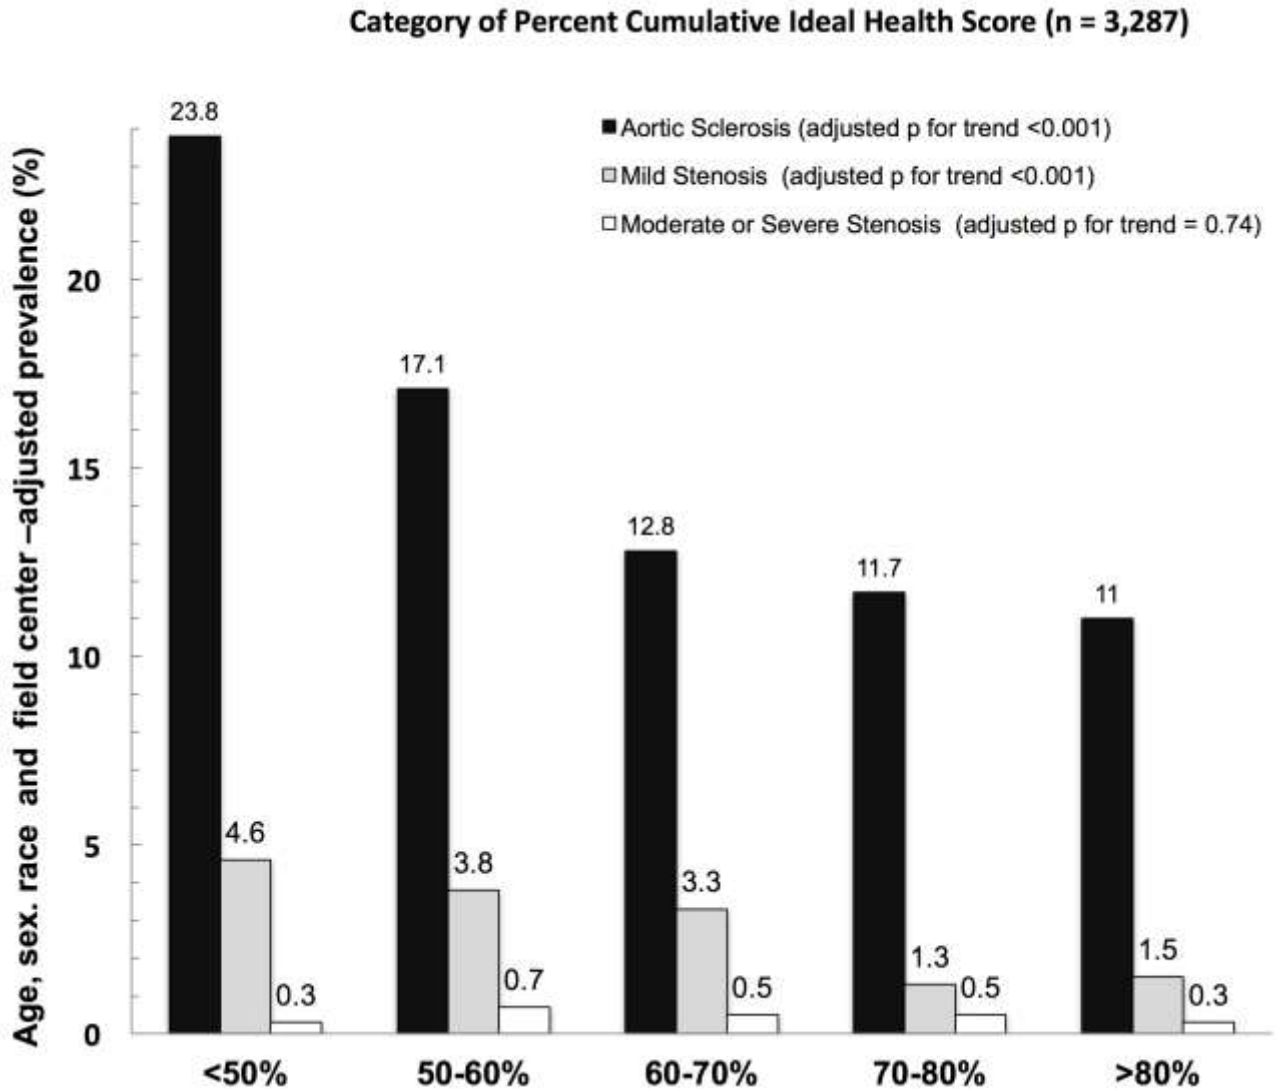

P for trend across categories is adjusted for age, sex, and field center.

AS = Aortic stenosis; AV = aortic valve; CVHS = Cardiovascular health score; eGFR = Estimated glomerular filtration rate.

**Figure S4.** Prevalence of AS, defined using the calculated AVA, based on category of percent attained CVHS from visit 1 through 5 excluding participants with coronary heart disease, atrial fibrillation, heart failure, stroke and eGFR <60 ml/min/1.73m<sup>2</sup>.

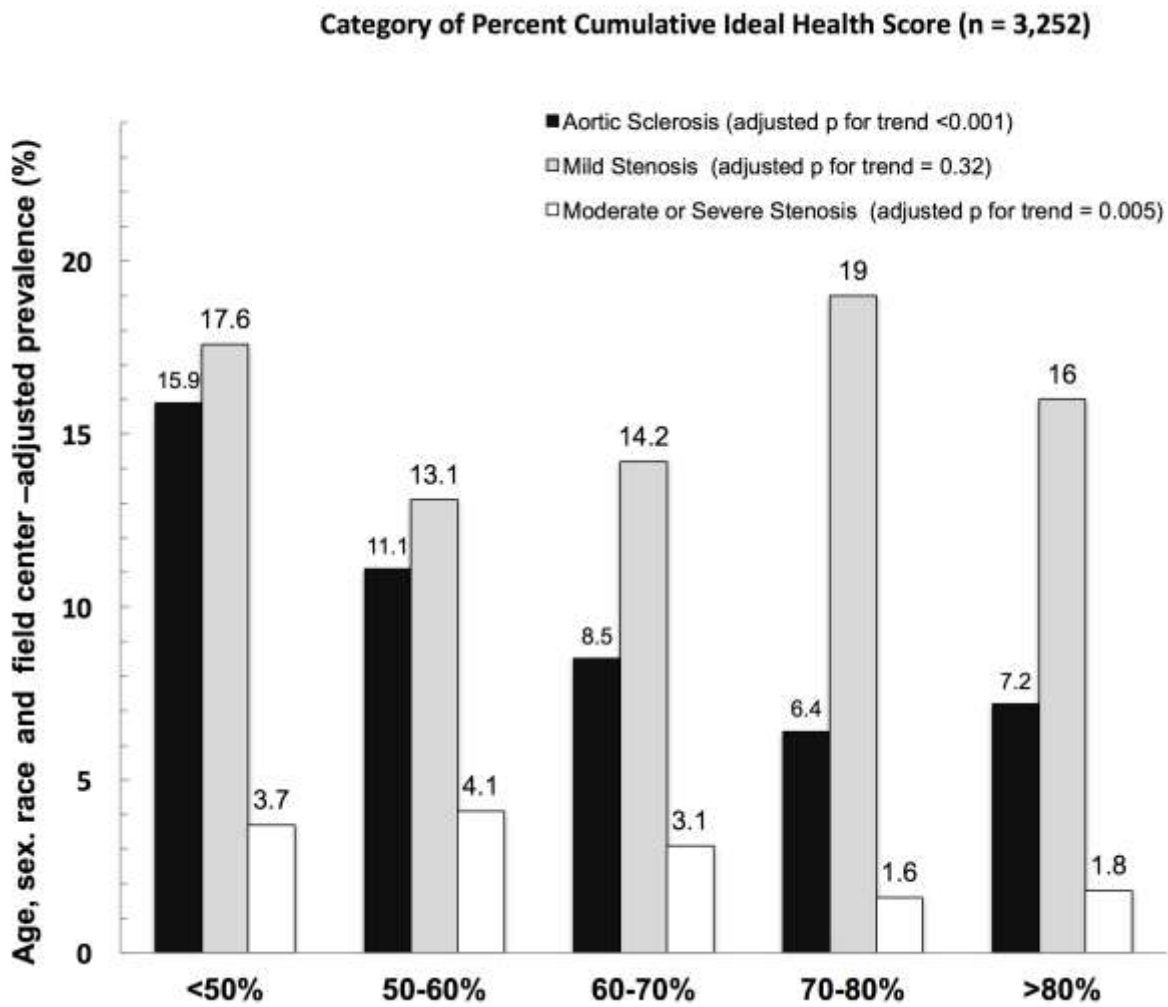

P for trend across categories is adjusted for age, sex, and field center. AS = Aortic stenosis; AVA = Aortic valve area; CVHS = Cardiovascular health score; eGFR = Estimated glomerular filtration rate.

**Figure S5.** Population attributable fraction for aortic valve dysfunction (sclerosis or stenosis) associated with a percent attained CVHS of <50%, <60%, <70%, and <80%.

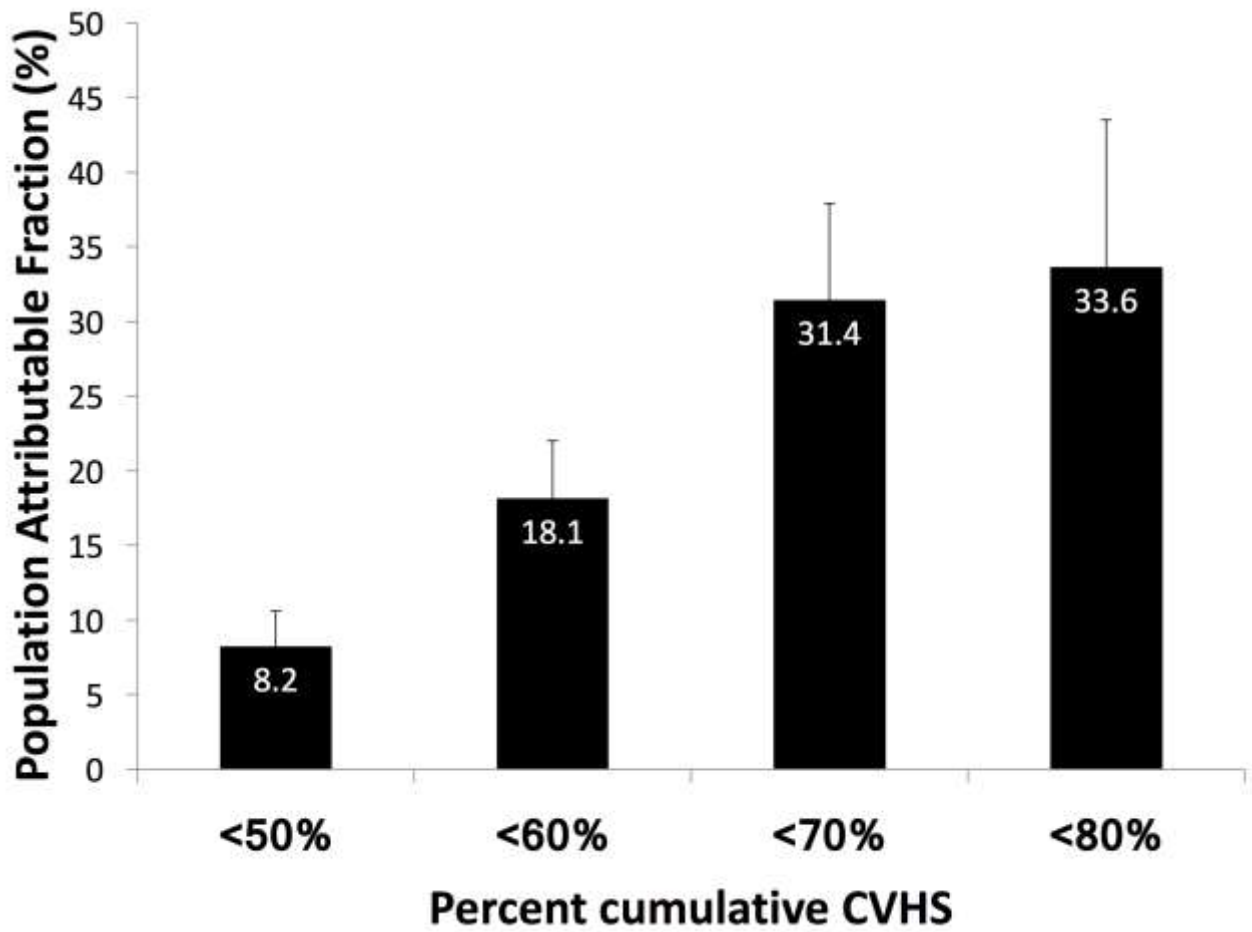

Values represent the proportion of aortic valve dysfunction that would be prevented if percent attained CVHS were consistently  $\geq 50\%$ ,  $\geq 60\%$ ,  $\geq 70\%$ , or  $\geq 80\%$  respectively. CVHS = Cardiovascular health score

**Figure S6.** Population attributable fraction for AV dysfunction (sclerosis or stenosis) associated with a percent attained CVHS through Visit 4 of <50%, <60%, <70%, and <80%.

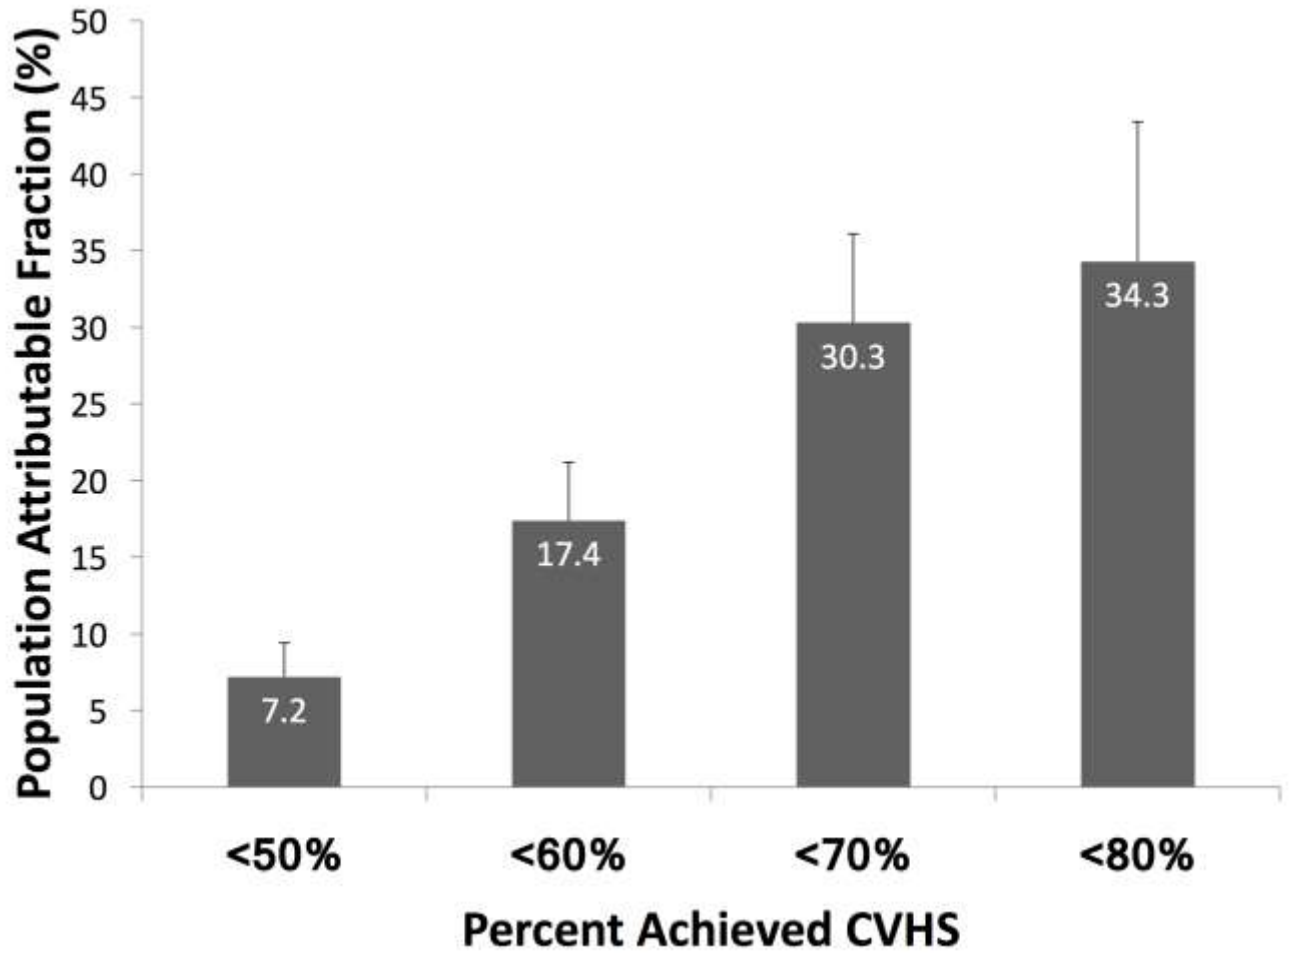

Values represent the proportion of AV dysfunction that would be prevented if percent attained CVHS through Visit 4 were consistently  $\geq 50\%$ ,  $\geq 60\%$ ,  $\geq 70\%$ , or  $\geq 80\%$  respectively. AV = Aortic valve; CVHS = Cardiovascular health score.

Figure S7. Histograms of (a) AV peak velocity and (b) AV area at ARIC visit 5 by sex and race.

a)

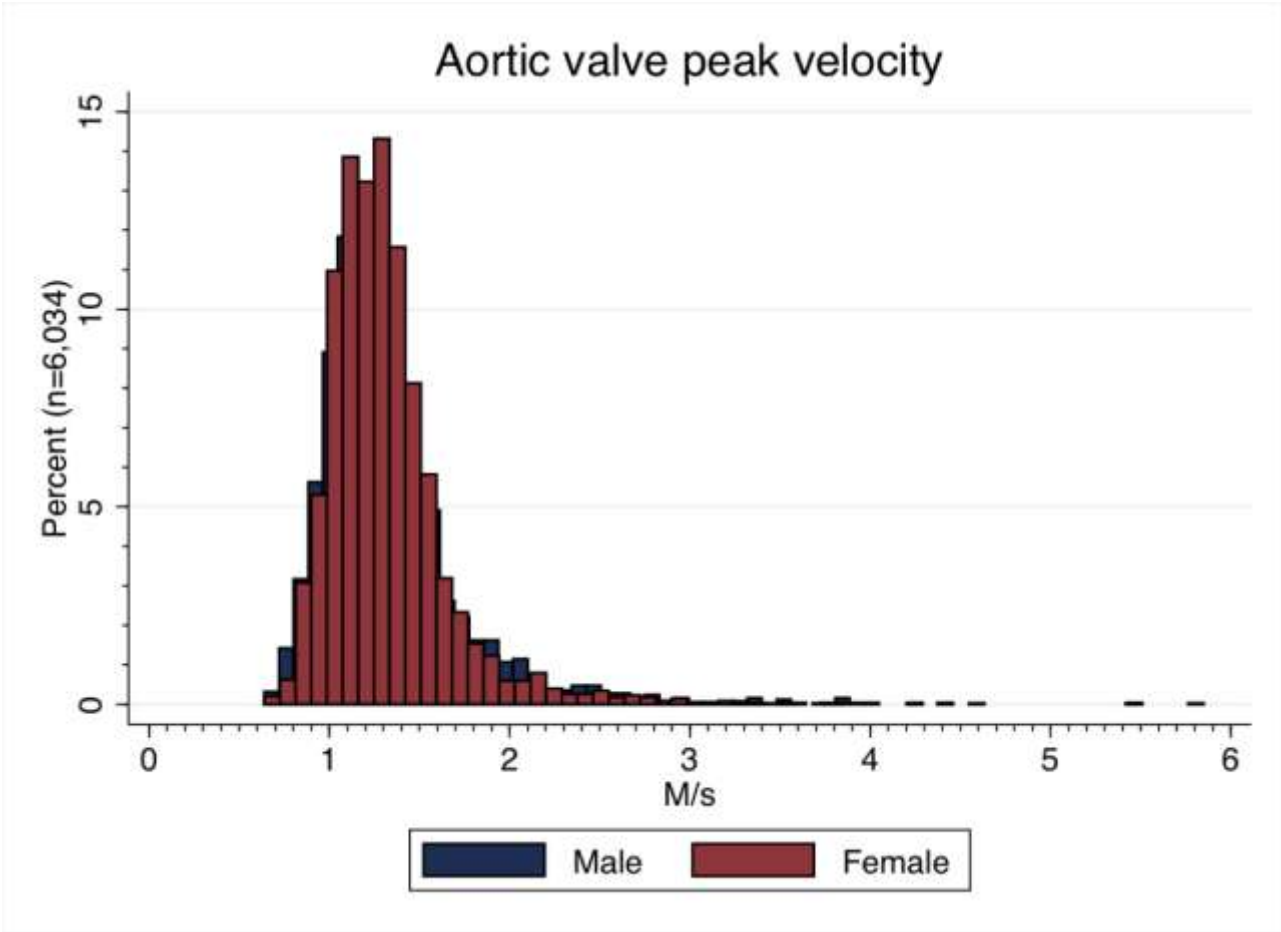

b)

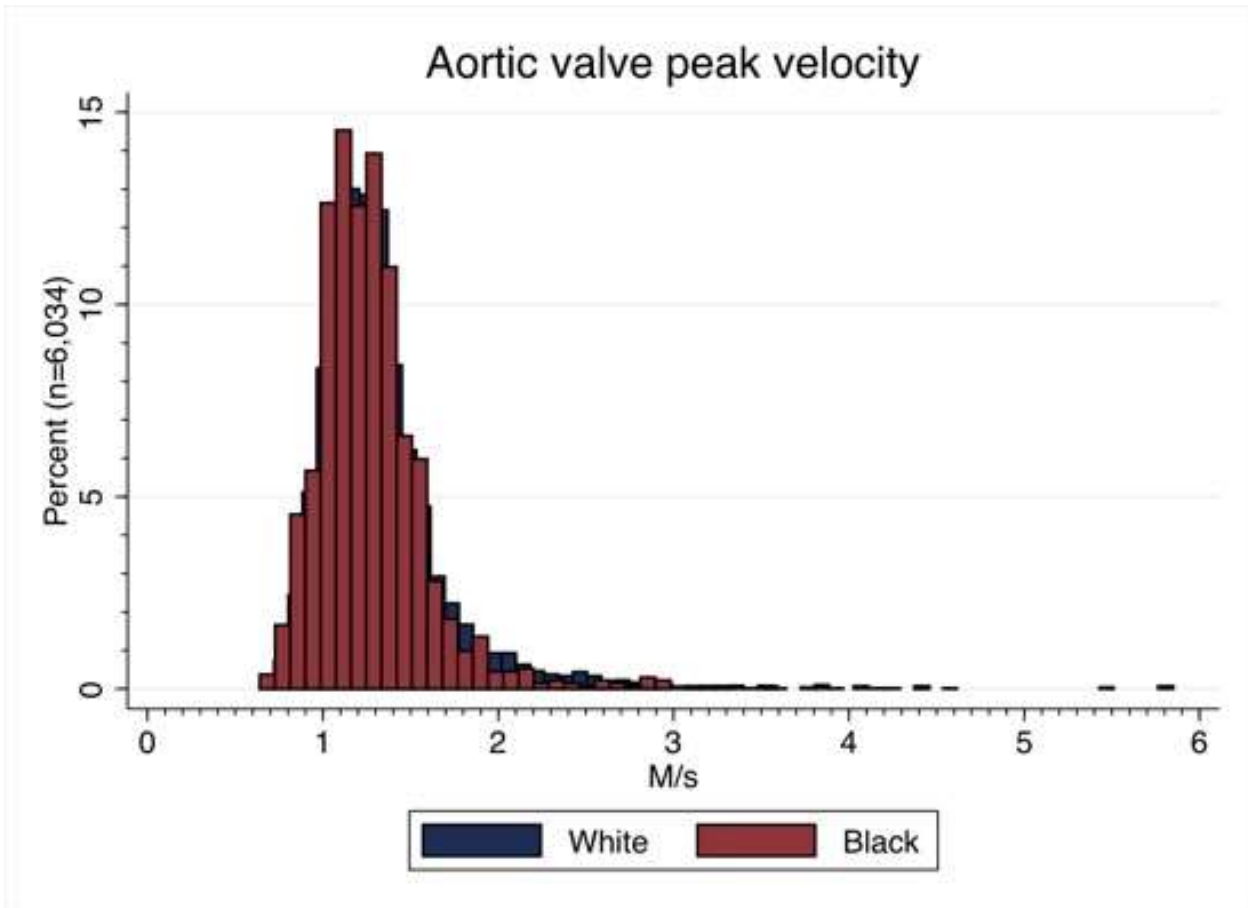

Atherosclerosis Risk in Communities Stud; AV = Aortic valve; CVHS = Cardiovascular health score

**Figure S8.** Scatter plots of AV peak velocity and percent attained CVHS with fitted linear regression lines by (a) sex and (b) race.

a)

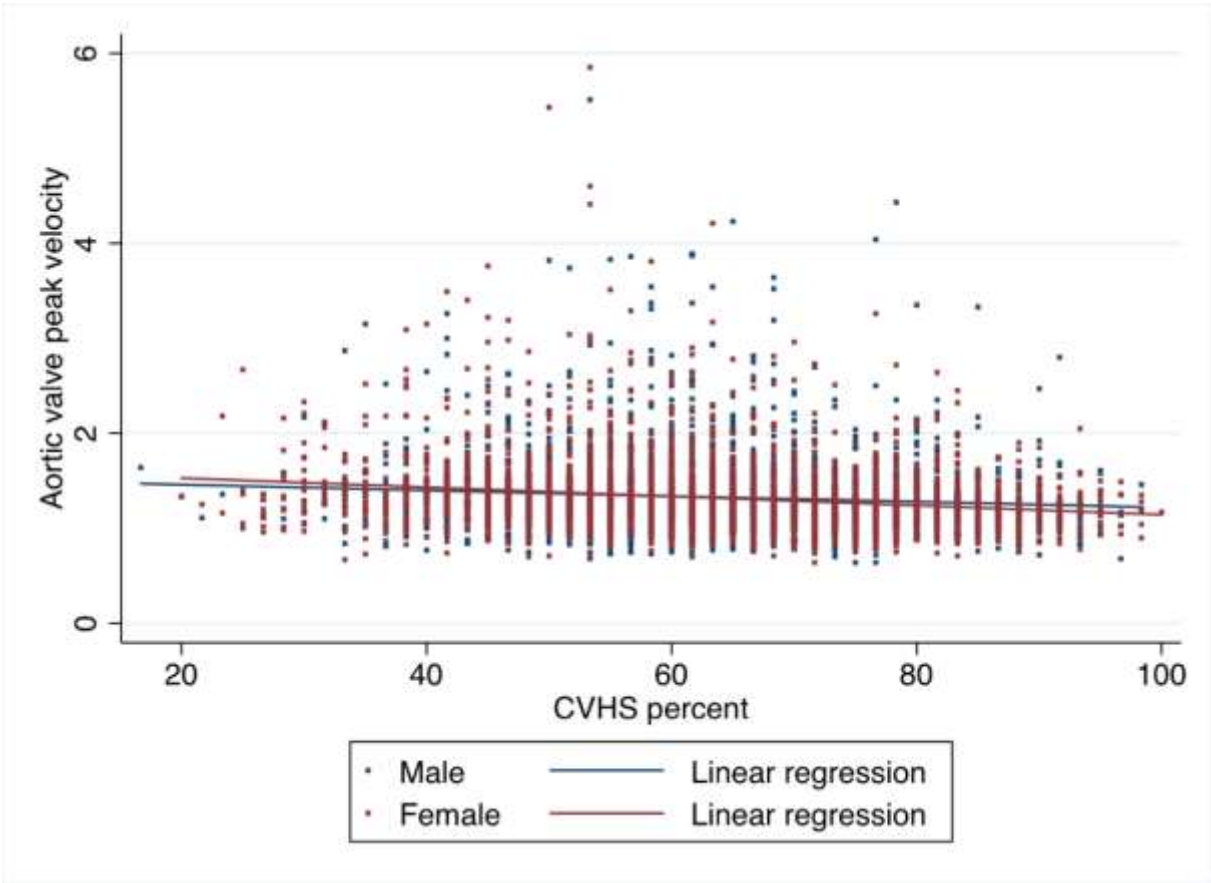

b)

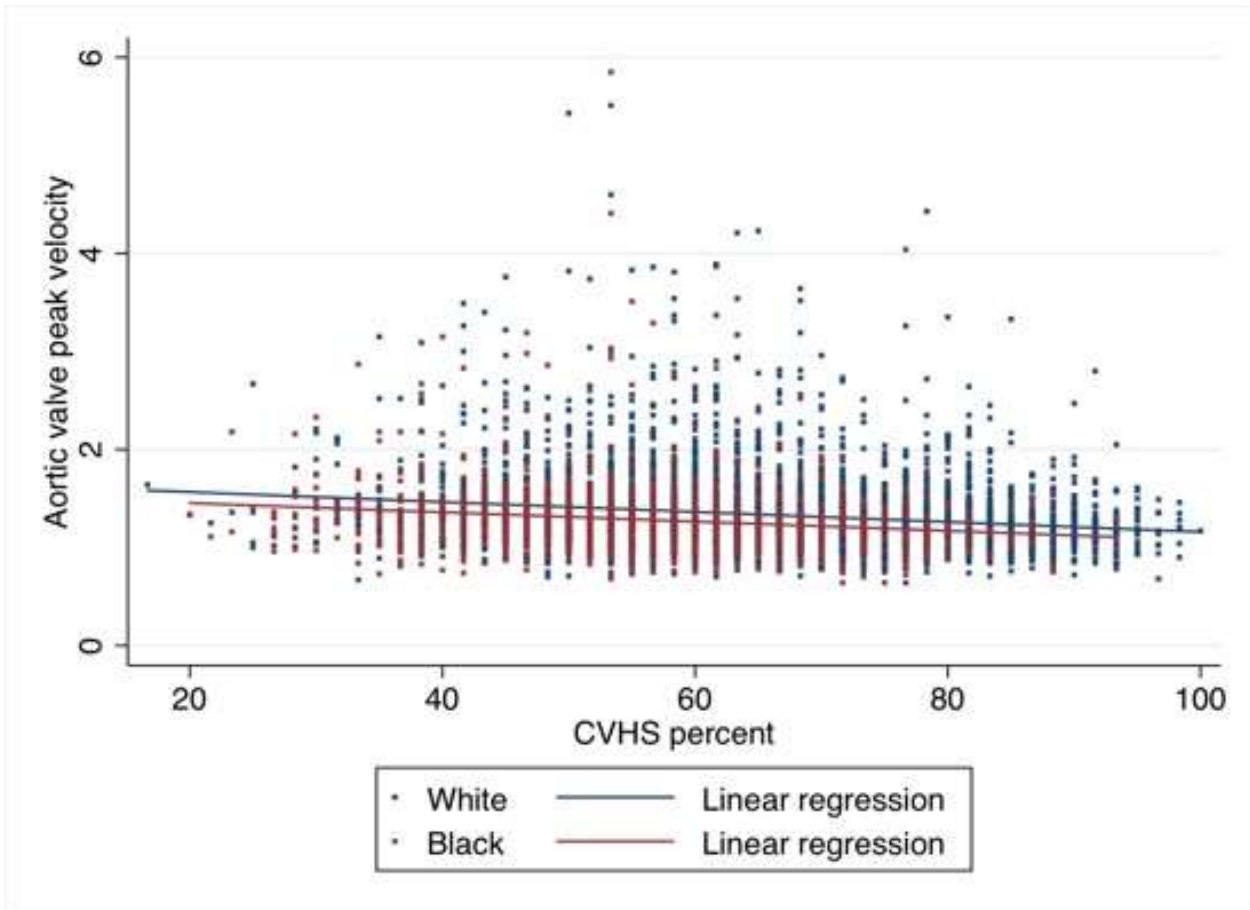

AV = Aortic valve; CVHS = Cardiovascular health score



**Figure S9.** Prevalence of AS, defined using the AV peak velocity, based on category of percent attained CVHS from visit 1 through 5 utilizing inverse probability of attrition weighting.

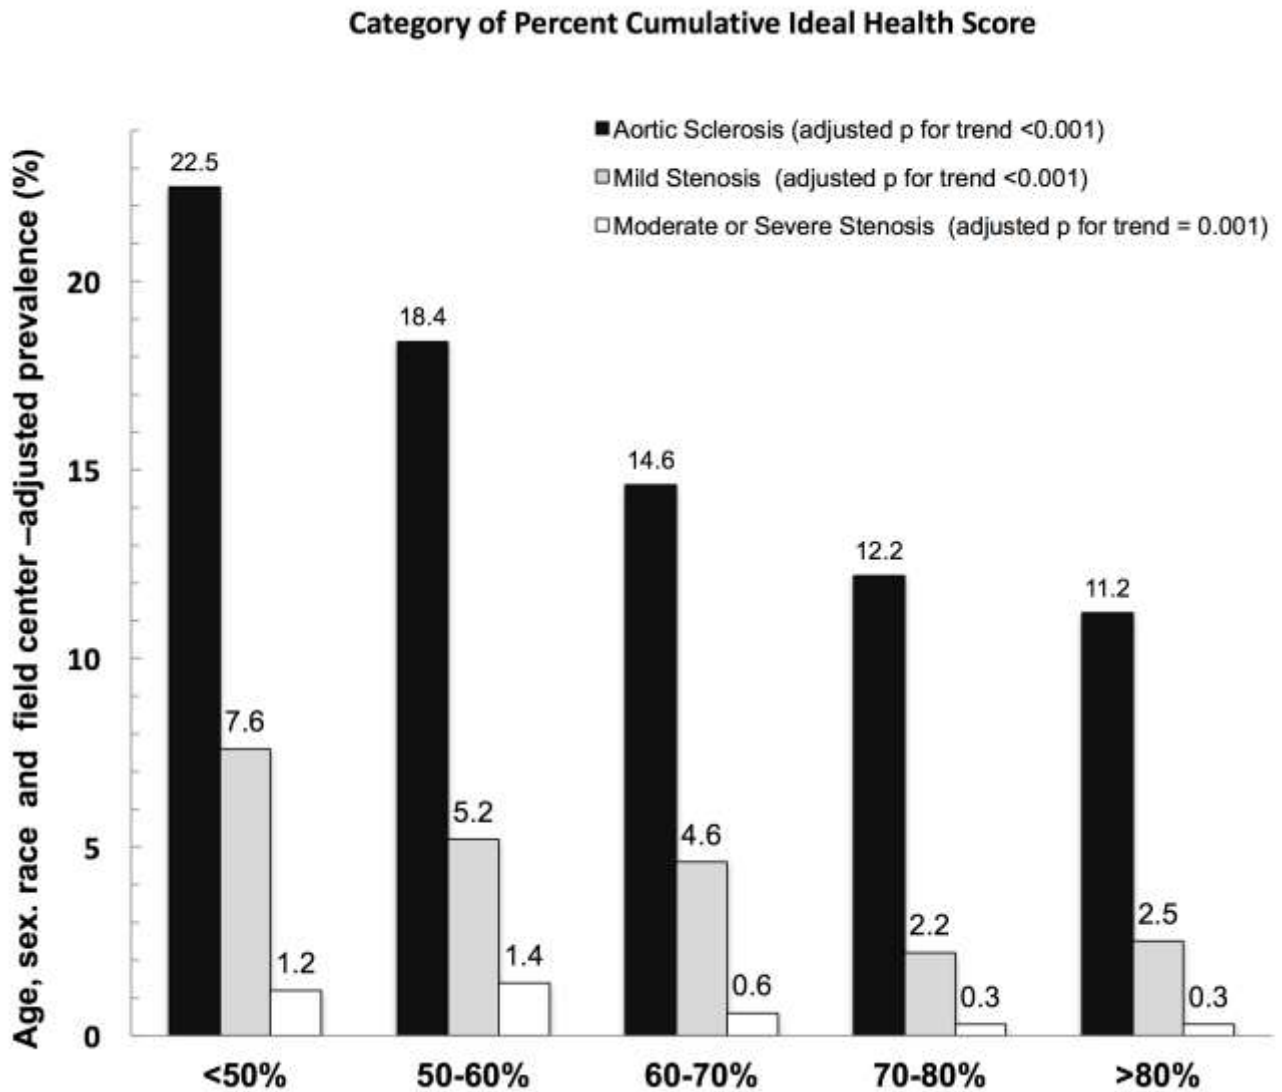

P for trend across categories is adjusted for age, sex, and field center. AS = Aortic stenosis; AS = Aortic stenosis; AV = Aortic valve; CVHS = Cardiovascular health score.
